# Supplementary material
Source: PubMed Central journal article supplement (PMC5568849)
Supplement: NIHMS893511-supplement-Supp_1.pdf [file NIHMS893511-supplement-Supp_1.pdf]

## Supplementary data

**Title: Temporal expression of Bim limits the development of agonist selected thymocytes and skews their TCR $\beta$  repertoire.**

**Authors:** Kun-Po Li<sup>1</sup>, Anke Fähnrich<sup>2</sup>, Eron Roy<sup>1</sup>, Carla M. Cuda<sup>3</sup>, H. Leighton Grimes<sup>1</sup>, Harris R. Perlman<sup>3</sup>, Kathrin Kalies<sup>2</sup>, and David A. Hildeman<sup>1\*</sup>

### **Affiliations:**

<sup>1</sup> Division of Immunobiology at Children's Hospital Medical Center, Cincinnati, OH 45229 and Department of Pediatrics at the University of Cincinnati, Cincinnati, Ohio 45257. USA.

<sup>2</sup> Institute for Anatomy at University of Lübeck, Lübeck, Germany.

<sup>3</sup> Rheumatology Division, Department of Medicine, Feinberg School of Medicine, Northwestern University, Chicago, IL. 60611. USA.

\*CORRESPONDENCE: David A. Hildeman, Department of Pediatrics, Division of Immunobiology MLC 7038, Cincinnati Children's Hospital Medical Center, 3333 Burnet Ave. Cincinnati, OH 45229. Phone: (513)-636-3923; Fax: (513)-636-5355; Email: [David.Hildeman@cchmc.org](mailto:David.Hildeman@cchmc.org)

**Running title:** Bim temporally limits the development and TCR repertoire of CD8 $\alpha\alpha$  precursors.

Supplementary Figure 1.

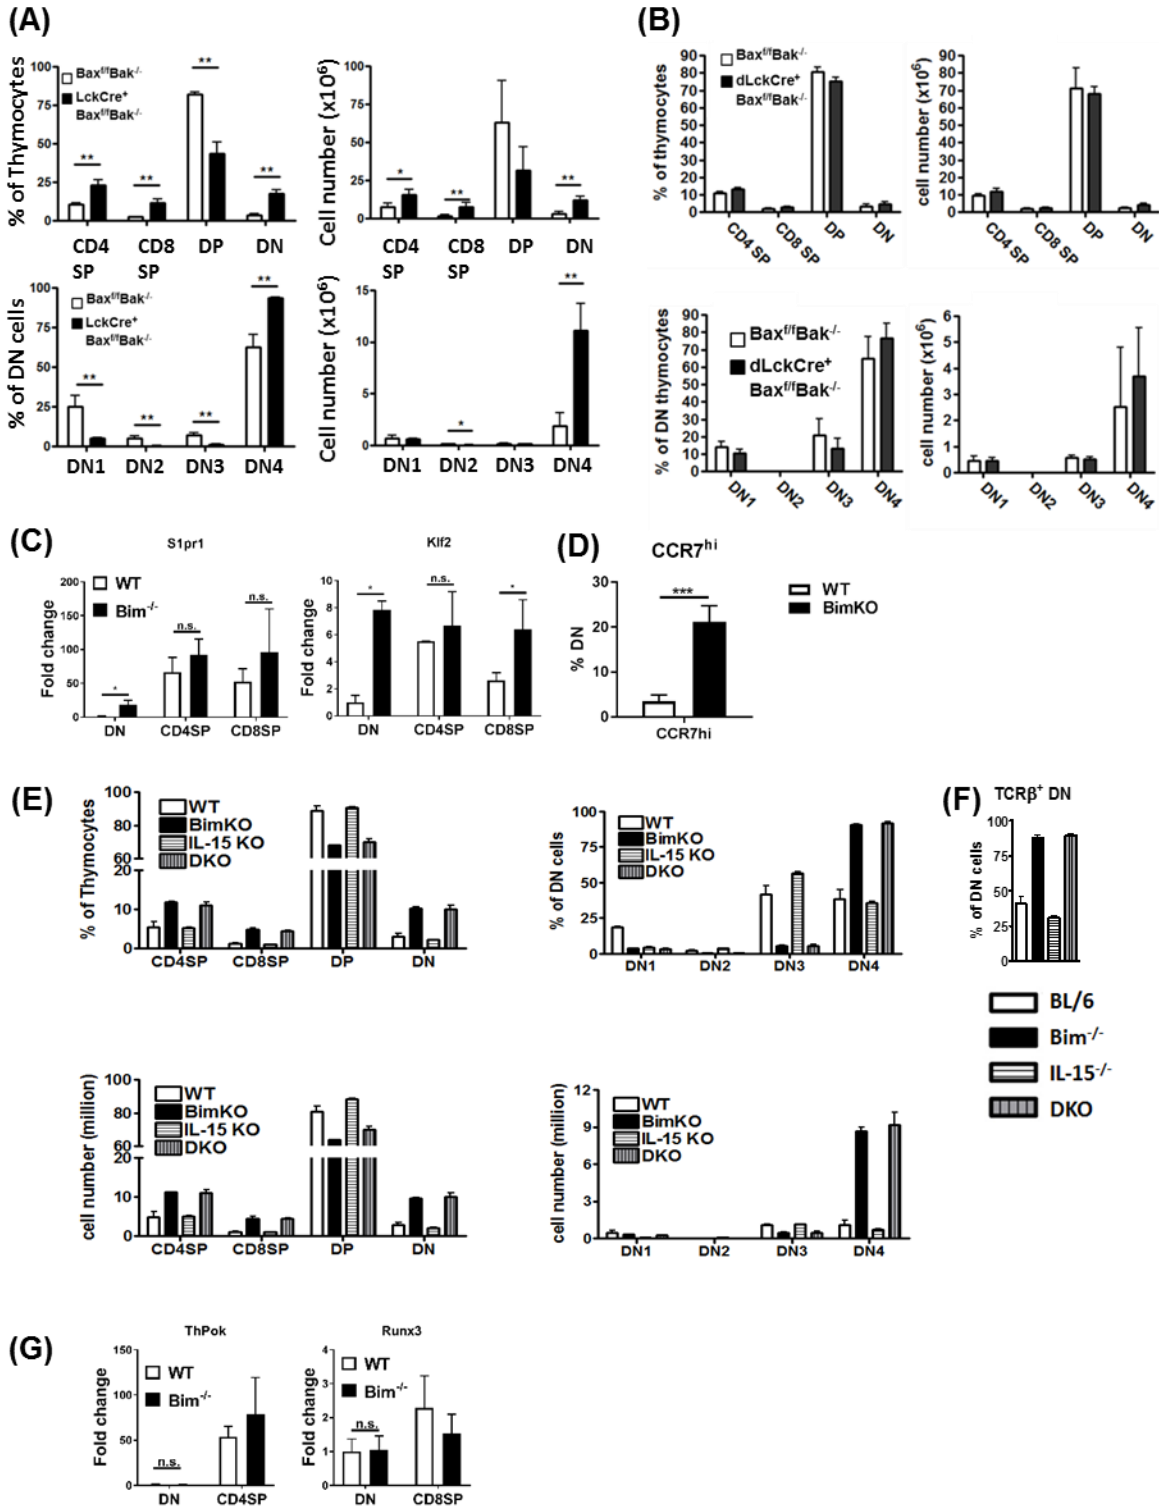

**Supplementary Figure 1. Thymic profiles of different genetic backgrounds.** (A) Thymocytes from LckCre<sup>+</sup>Bax<sup>f/f</sup>Bak<sup>-/-</sup> mice or Bax<sup>f/f</sup>Bak<sup>-/-</sup> control littermates (n=3) were stained with Abs and analyzed by flow cytometry. The bar graphs show the frequency and cell numbers of each population from either Bax<sup>f/f</sup>Bak<sup>-/-</sup> (white bars) or LckCre<sup>+</sup>Bax<sup>f/f</sup>Bak<sup>-/-</sup> (black bars) mice. Results are representative of at least two independent experiments. (B) Thymocytes from dLckCre<sup>+</sup>Bax<sup>f/f</sup>Bak<sup>-/-</sup> mice or Bax<sup>f/f</sup>Bak<sup>-/-</sup> control littermates (n=3) were analyzed by flow cytometry. The bar graphs show the frequency and cell numbers of each population from either Bax<sup>f/f</sup>Bak<sup>-/-</sup> (white bars) or dLckCre<sup>+</sup>Bax<sup>f/f</sup>Bak<sup>-/-</sup> (black bars) mice. Results are representative of at least two independent experiments. (C) The expression levels of S1pr1 and Klf2 were examined in sorted DN (CD4<sup>-</sup>CD8<sup>-</sup>), CD4SP (CD4<sup>+</sup>CD8<sup>-</sup>), or CD8SP(CD4<sup>-</sup>CD8<sup>+</sup>) thymocytes from either C57BL/6 WT mice (white bars) or Bim<sup>-/-</sup> mice (black bars). (D) The CCR7<sup>hi</sup> frequency among DN (CD4<sup>-</sup>CD8<sup>-</sup>) thymocytes from either C57BL/6 WT mice (white bars) or Bim<sup>-/-</sup> mice (black bars) were tested by flow cytometry. (E) Thymocytes from C57BL/6 (BL/6), Bim<sup>-/-</sup>, IL-15<sup>-/-</sup>, or Bim<sup>-/-</sup> IL-15<sup>-/-</sup> (DKO) mice (n=3) were analyzed by flow cytometry. The bar graphs show the frequency and cell numbers of each population from either BL/6 (white bars), Bim<sup>-/-</sup> (black bars), IL15 KO (horizontal striped bars), or IL-15<sup>-/-</sup>Bim<sup>-/-</sup> (DKO, vertical striped bars). (F) TCRβ<sup>+</sup> frequency amount CD25<sup>-</sup>CD44<sup>-</sup> DN thymocytes is shown in the bottom panel. Results are representative of at least two independent experiments. (G) The ThPok or Runx3 mRNA expression levels of purified DN (CD4<sup>-</sup>CD8<sup>-</sup>), CD4SP (CD4<sup>+</sup>CD8<sup>-</sup>), or CD8SP(CD4<sup>-</sup>CD8<sup>+</sup>) thymocytes from either C57BL/6 or Bim<sup>-/-</sup> mice were analyzed by real-time PCR.

(Mean ± SD; \* p<0.05; \*\* p<0.01; \*\*\* p<0.001).

The primers used are listed below:

S1pr1: Fw: TATGGAGCTTTTCCTTGGCT; Rv: CGGTGTAGACCCAGAGTCCT.

Klf2: Fw: GTGGCAGGTGGAGCCAAG; Rv: GTTGCACTACGGGCCTCC.

ThPok: Fw: ATGGGATTCCAATCAGGTCA; Rv: TTCTTCCTACACCCTGTGCC.

Runx3: Fw: GGTCACCACCGTTCCATC; Rv: ACTTCCTCTGCTCCGTGCT.

Supplementary Figure 2.

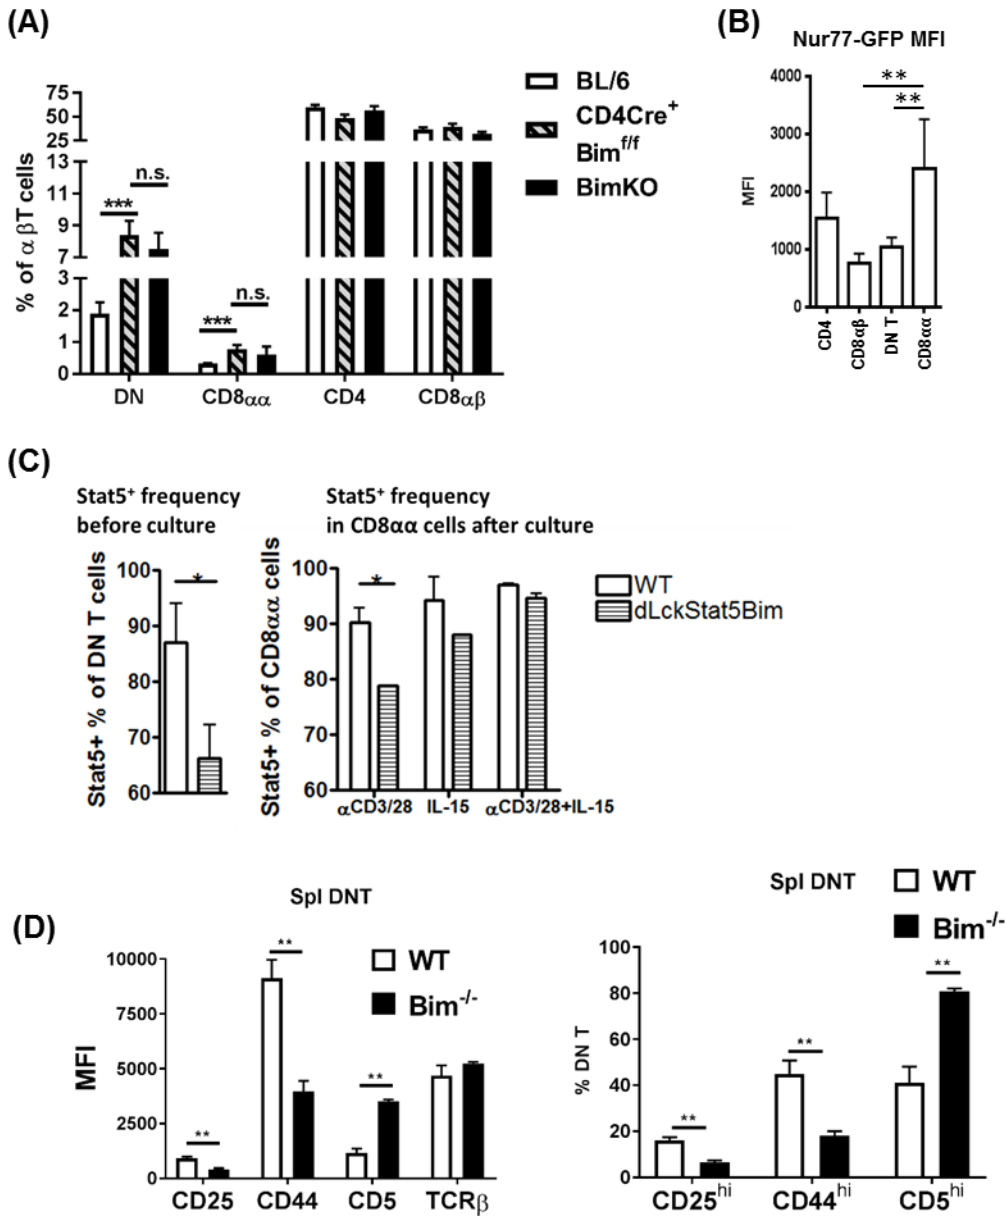

**Supplementary Figure 2. Characterization of splenic DN T cells.** (A) Splenocytes from Bim<sup>f/f</sup> (WT) or CD4<sup>+</sup>Bim<sup>f/f</sup> mice (n=3) were analyzed by flow cytometry. The bar graphs show the frequency of each population among TCR $\beta$ <sup>+</sup> T cells. Results are representative of at least three independent experiments. (B) C57BL/6-Tg (Nr4a1-EGFP/cre)820Khog/J (Nur77<sup>GFP</sup>) mice were

obtained from Jackson Labs (Bar Harbor, ME, USA). Splenocytes from Nur77<sup>GFP</sup> mice (n=3) were stained with Abs and analyzed by flow cytometry. The bar graphs show the MFI of GFP fluorescence among each population of TCR $\beta$ <sup>+</sup> T cells. Results are representative of at least two independent experiments. (Mean  $\pm$  SD). (C) The sorted splenic DN T cells (CD4<sup>-</sup>CD8 $\alpha$ <sup>-</sup>TCR $\beta$ <sup>+</sup>CD19<sup>-</sup>MHC II<sup>-</sup>NK1.1<sup>-</sup>) from either BL/6 or dLckCre<sup>+</sup>Bim<sup>f/f</sup>Stat5<sup>f/f</sup> mice were cultured for CD8 $\alpha\alpha$  T cell induction. The cells were stimulated with plate-bound anti-CD3/CD28 Ab and/or 20 ng/ml of recombinant IL-15 for 24 hr. The left bar graphs show the frequency of Stat5<sup>hi</sup> cells within *ex vivo* splenic DN T cells from either BL/6 (white bars) or dLckCre<sup>+</sup>Bim<sup>f/f</sup>Stat5<sup>f/f</sup> (striped bars) mice before culture. The right bar graphs show the frequency of Stat5<sup>hi</sup> cells within CD8 $\alpha\alpha$  T cells induced by different treatments. (D) Splenic DN T cells from C57BL/6 (WT) or Bim<sup>-/-</sup> mice (n=3) were analyzed by flow cytometry. The MFI or frequencies of indicated markers or populations were shown. (Mean  $\pm$  SD; \* p<0.05; \*\* p<0.01).

**Supplementary Figure 3.**

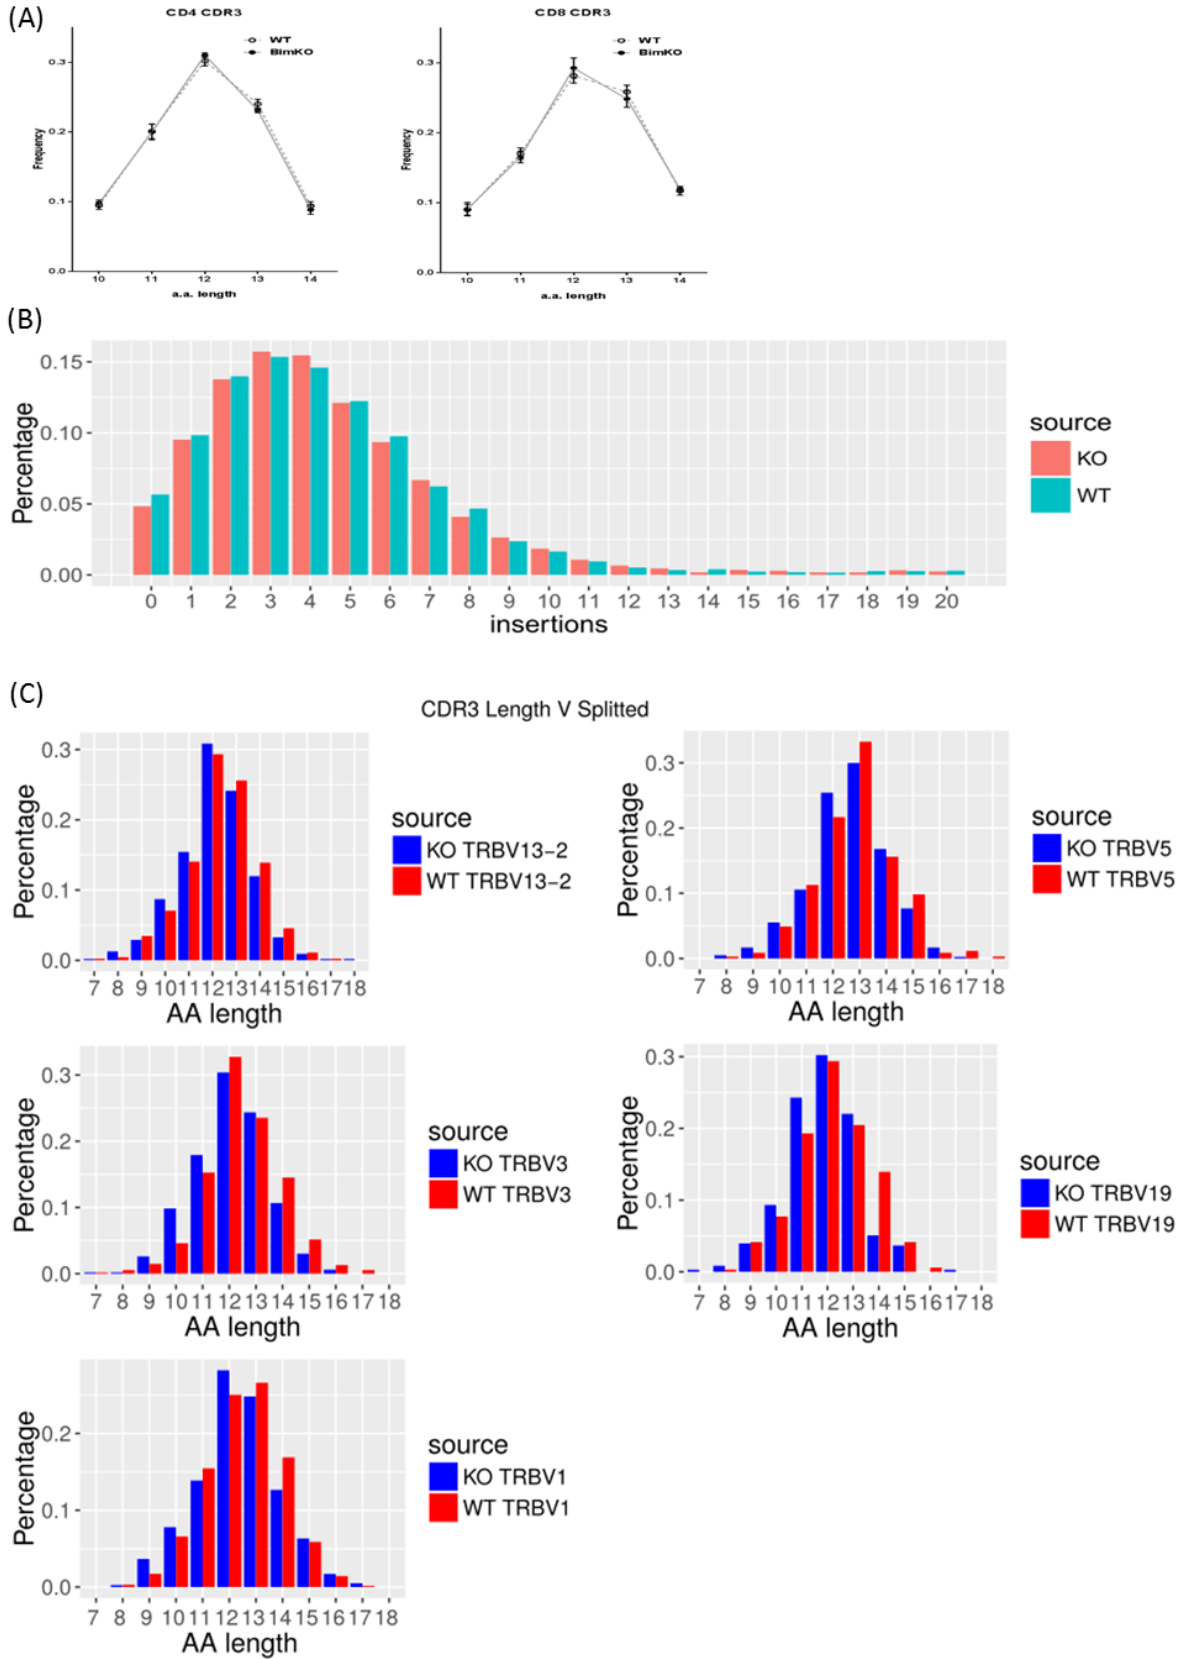

**Supplementary Figure 3. TCR $\beta$  CDR3 analysis.** Splenic CD4<sup>+</sup> (CD4<sup>+</sup>TCR $\beta$ <sup>+</sup>), CD8<sup>+</sup> (CD8<sup>+</sup>TCR $\beta$ <sup>+</sup>) conventional T cells, or DN T cells were isolated from C57BL/6 (WT) or Bim<sup>-/-</sup> mice, and the TCR $\beta$  CDR3 repertoire of were sequenced by Illumina MiSeq system. (A) Amino acid lengths of CD4 or CD8 T cells are shown in histogram. (WT: n=5; KO: n=3; Mean  $\pm$  SD). (B) Among DN T cell repertoire, the number of N-insertion nucleotides among the germline V/D and D/J junctions were counted for each sample and plotted against their relative frequency. (C) Among DN T cell repertoire, the subsampled clonotypes for DN T cells from either Bim<sup>-/-</sup> or WT mice were sorted according to their V $\beta$  chains. Subsequently, the clonotypes were sorted regarding their CDR3 lengths. The CDR3 lengths of the five most frequent V $\beta$  were plotted in the lower panel.



**Supplementary Table 1.**Number of cells, raw reads and unique TCR $\beta$  sequences of T cells from naïve mice.

| Mouse   | Cell numbers<br>(x10 <sup>6</sup> ) | Nb. of raw<br>reads (x10 <sup>6</sup> ) | Nb. of CDR3 containing reads<br>(x10 <sup>6</sup> ) | Unique CDR3<br>sequences |
|---------|-------------------------------------|-----------------------------------------|-----------------------------------------------------|--------------------------|
| WT1 CD4 | 2                                   | 1.3                                     | 1.24                                                | 99387                    |
| WT1 CD8 | 2                                   | 1.3                                     | 1.22                                                | 127095                   |
| WT2 CD4 | 2                                   | 1.6                                     | 1.53                                                | 119260                   |
| WT2 CD8 | 2                                   | 1.4                                     | 1.32                                                | 146567                   |
| WT2 DN  | 0.023                               | 1.7                                     | 1.02                                                | 4902                     |
| WT3 CD4 | 2                                   | 1.62                                    | 1.55                                                | 129990                   |
| WT3 CD8 | 2                                   | 1.73                                    | 1.67                                                | 177702                   |
| WT3 DN  | 0.023                               | 2.08                                    | 0.35                                                | 2029                     |
| WT4 CD4 | 0.5                                 | 2.55                                    | 2.4                                                 | 159387                   |
| WT4 CD8 | 0.5                                 | 2.48                                    | 2.30                                                | 156463                   |
| WT4 DN  | 0.04                                | 2.7                                     | 1.5                                                 | 15566                    |
| WT5 CD4 | 0.5                                 | 2.69                                    | 2.5                                                 | 157957                   |
| WT5 CD8 | 0.5                                 | 1.97                                    | 1,7                                                 | 117955                   |
| WT5 DN  | 0.04                                | 2                                       | 1.67                                                | 16121                    |
| KO1 CD4 | 2                                   | 0.99                                    | 0.9                                                 | 70606                    |
| KO1 CD8 | 2                                   | 0.97                                    | 0.9                                                 | 113156                   |
| KO1 DN  | 0.16                                | 1.47                                    | 1.3                                                 | 41058                    |
| KO2 CD4 | 2                                   | 1.32                                    | 1.2                                                 | 83484                    |
| KO2 CD8 | 2                                   | 1.65                                    | 1.5                                                 | 148902                   |
| KO2 DN  | 0.108                               | 1.54                                    | 1.1                                                 | 14557                    |
| KO3 CD4 | 2                                   | 1.91                                    | 1.8                                                 | 85209                    |
| KO3 CD8 | 2                                   | 1.86                                    | 1.8                                                 | 170501                   |
| KO3 DN  | 0.14                                | 1.78                                    | 1.6                                                 | 56916                    |
